# Supplementary material for: The Role of Acyl-CoA Synthetase 1 in Bioactive Lipid Accumulation and the Development of Hepatic Insulin Resistance
Source: MDPI journal article supplement (doi:10.3390/nu16071003), 2024-03-29

## Supplementary Figures

The sequence of application of the samples into the gel wells was individually set for particular proteins.

**Figure S1.** Full unedited gel for Figure Aclsl1. The sequence of application the samples into the gel wells: 1 lane – Protein standard (STD), 2-6 lane –Control sample, 7-11 lane – HFD<sub>(+/+)</sub> sample, 20-24 lane – HFD<sub>(-Aclsl1)</sub> sample, 25 lane – Protein standard (STD), the rest of the lane – other samples (not analyzed - X).

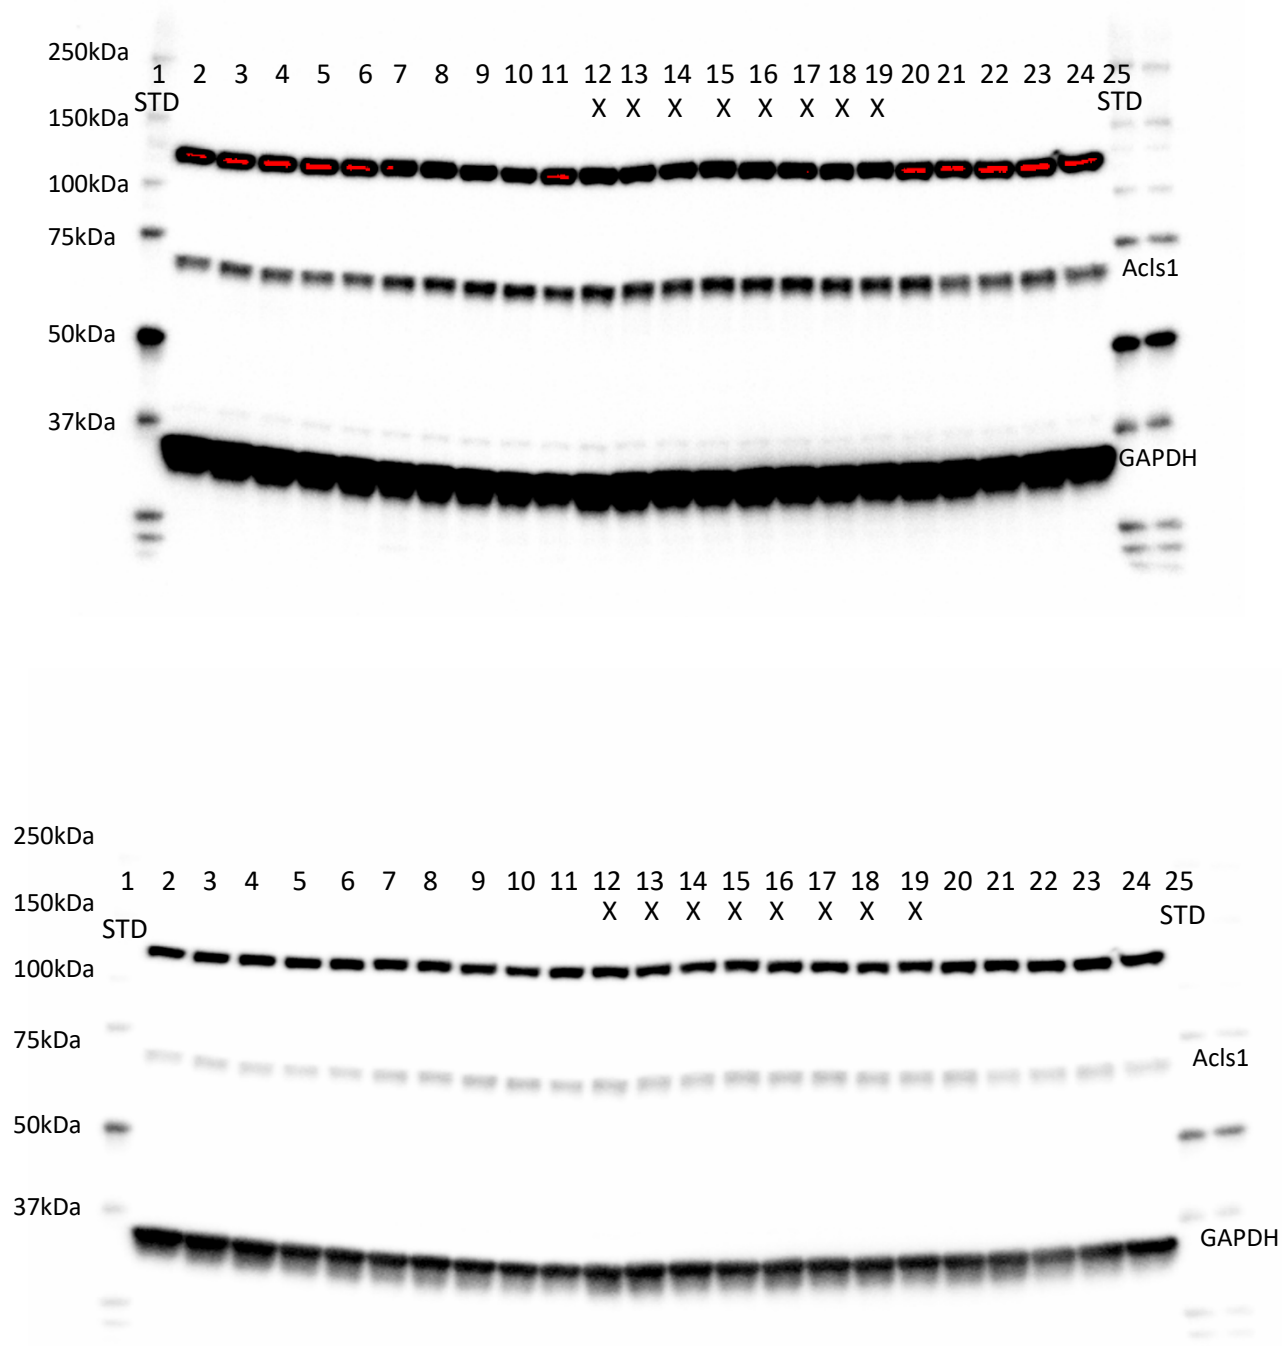

**Figure S2.** Full unedited gel for Figure Akt. **The sequence of application the samples into the gel wells:** 1 lane – Protein standard (STD), 2-5 lane – Control sample, 6-9 lane – HFD  $(+/+)$  sample, 10-13 lane – HFD $_{(-ACSL1)}$  sample, 26 lane – Protein standard (STD), the rest of the lane – other samples (not analyzed - X). *GAPDH used for normalization was run on a different gel (pAkt(S473) gel nr 3) and is located below.*

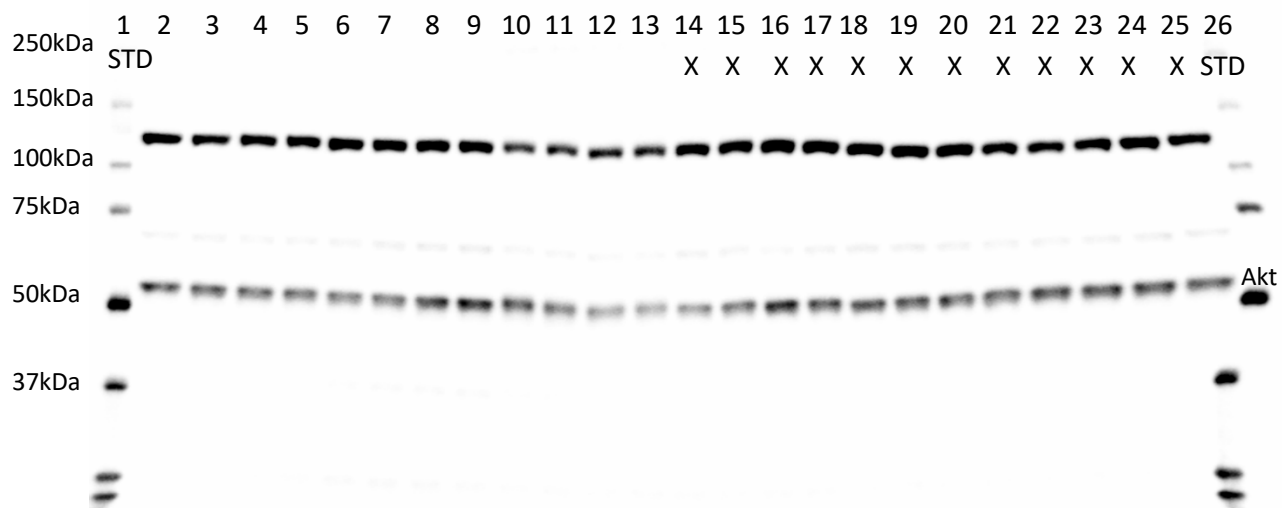

**Figure S3.** Full unedited gel for Figure pAkt(S473). **The sequence of application the samples into the gel wells:** 1 lane – Protein standard (STD), 2-5 lane – Control sample, 6-9 lane – HFD  $(+/+)$  sample, 10-13 lane – HFD $_{(-ACSL1)}$  sample, 26 lane – Protein standard (STD), the rest of the lane – other samples (not analyzed - X).

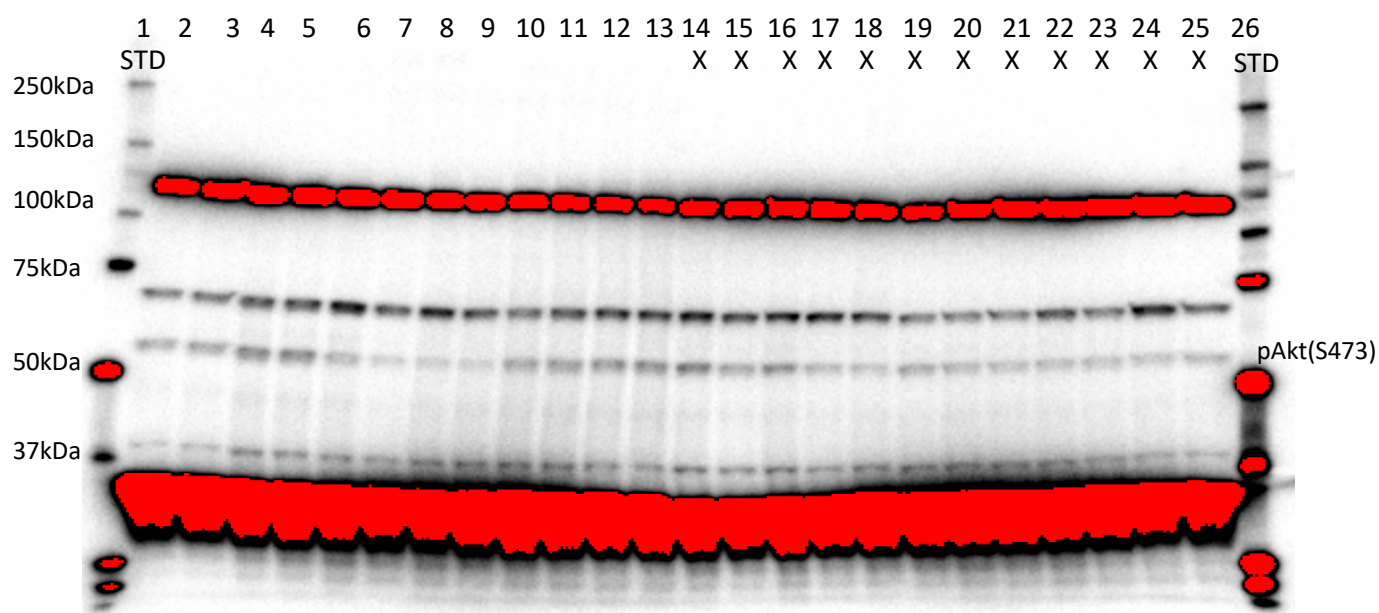

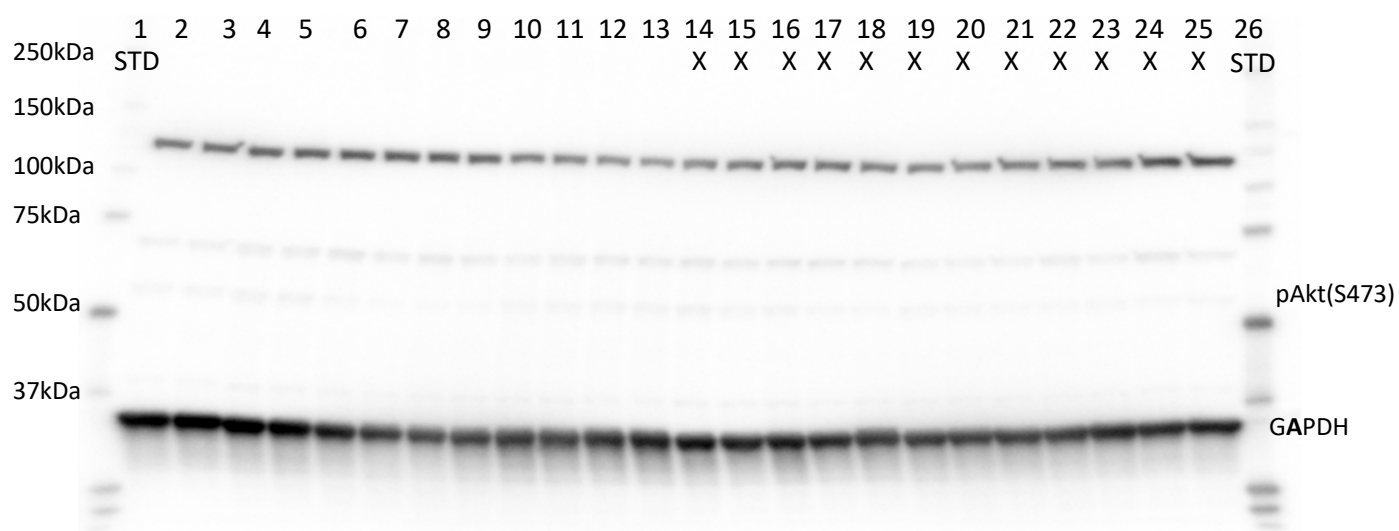

**Figure S4.** Full unedited gel for Figure FOXO1. **The sequence of application the samples into the gel wells:** 1 lane – Protein standard (STD), 2-5 lane – Control sample, 6-9 lane – HFD<sub>(+/+)</sub> sample, 10-13 lane – HFD<sub>(-ACSL1)</sub> sample, 26 lane – Protein standard (STD), the rest of the lane – other samples (not analyzed - X). *GAPDH* used for normalization was run on a different gel (gel nr 8) and is located below.

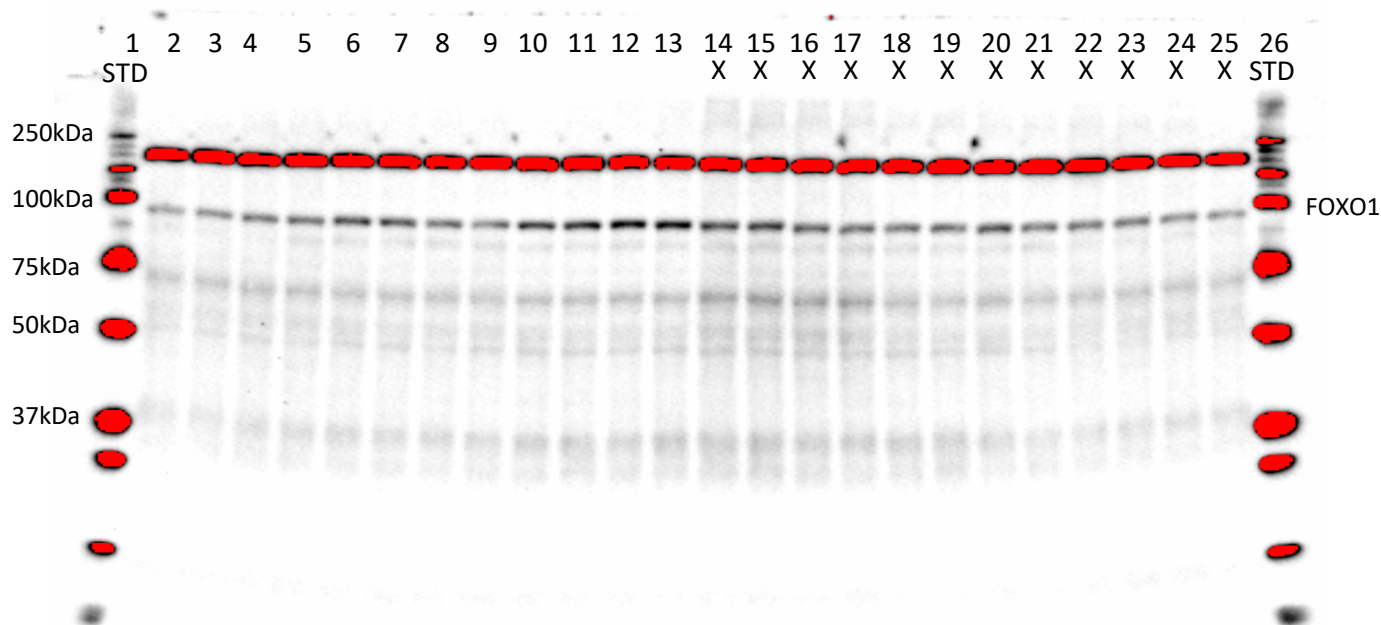

**Figure S5.** Full unedited gel for Figure FOXO1 (S256). The sequence of application the samples into the gel wells: 1 lane – Protein standard (STD), 2-5 lane – Control sample, 6-9 lane – HFD<sub>(+/+)</sub> sample, 10-13 lane – HFD<sub>(-ACSL1)</sub> sample, 26 lane – Protein standard (STD), the rest of the lane – other samples (not analyzed - X). GAPDH used for normalization was run on a different gel (gel nr 8) and is located below.

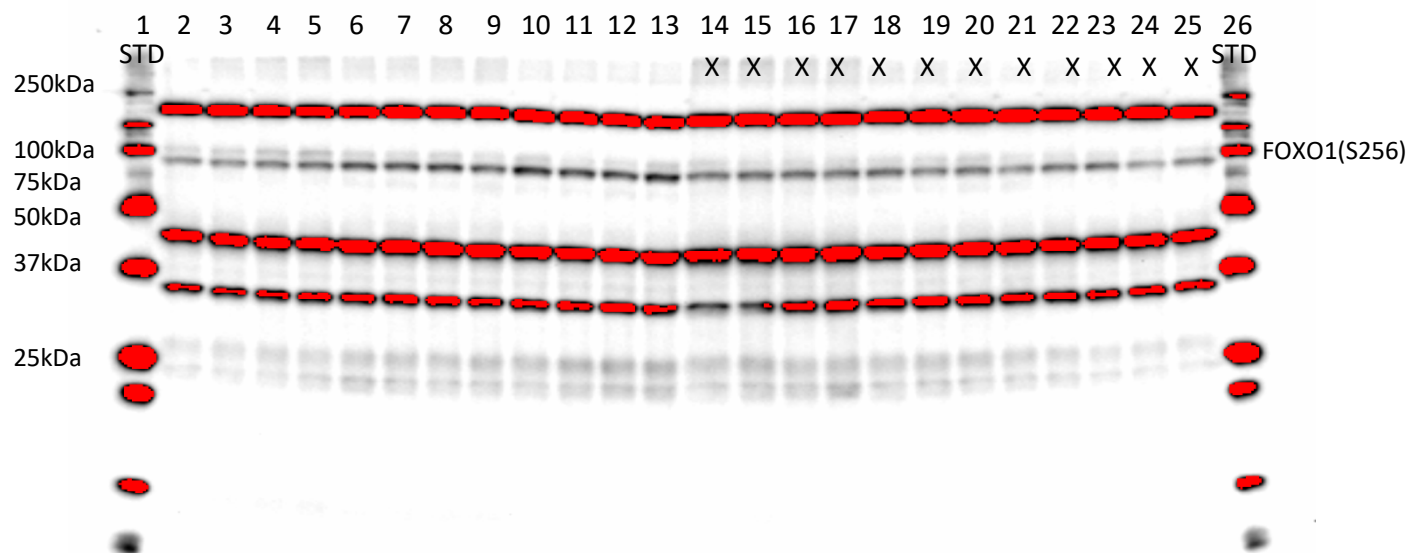

**Figure S6.** Full unedited gel for Figure PEPCK. The sequence of application the samples into the gel wells: 1 lane – Protein standard (STD), 2-5 lane – Control sample, 6-9 lane – HFD<sub>(+/+)</sub> sample, 10-13 lane – HFD<sub>(-ACSL1)</sub> sample, 26 lane – Protein standard (STD), the rest of the lane – other samples (not analyzed - X).

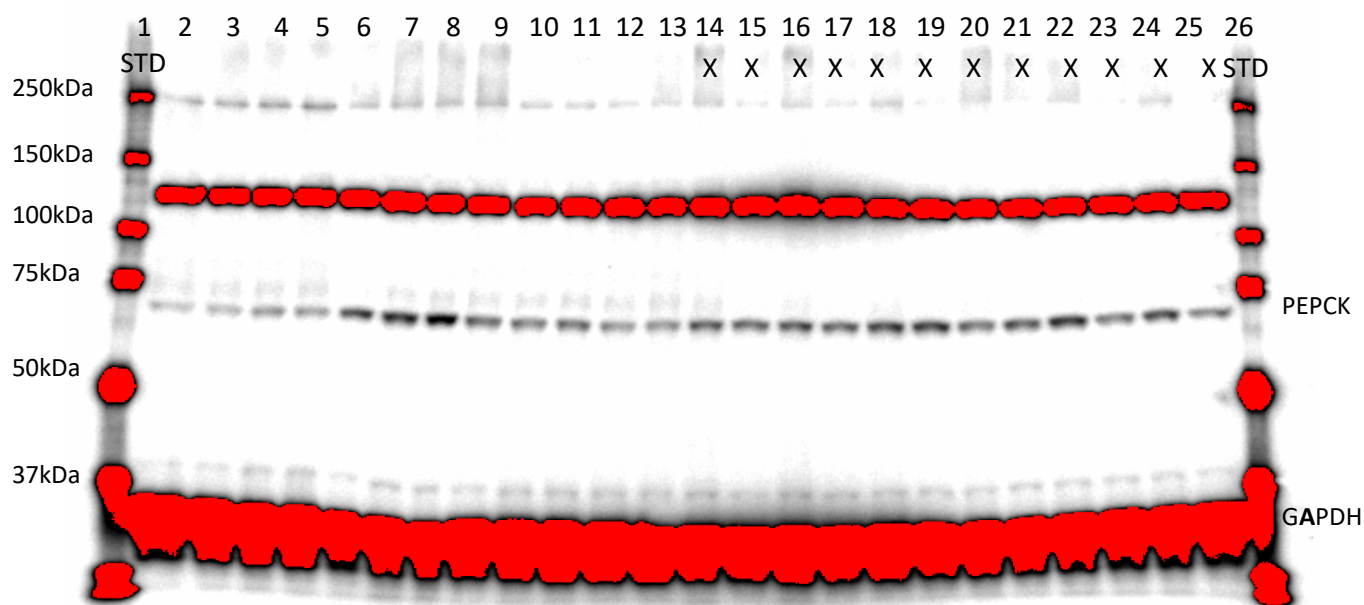

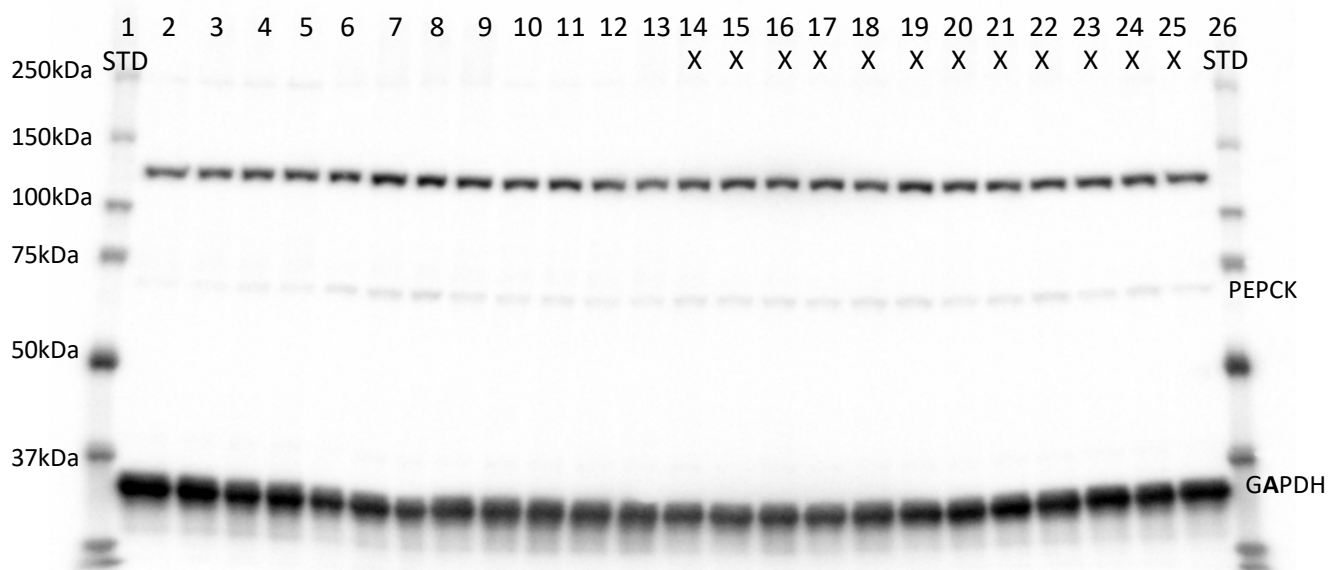

**Figure S7.** Full unedited gel for Figure GYS2. **The sequence of application the samples into the gel wells:**

1 lane – Protein standard (STD), 2-5 lane – Control sample, 6-9 lane – HFD <sup>(+/+)</sup> sample, 10-13 lane – HFD <sup>(-ACSL1)</sup> sample, 26 lane – Protein standard (STD), the rest of the lane – other samples (not analyzed). *GAPDH* used for normalization was run on a different gel (gel nr 8) and is located below.

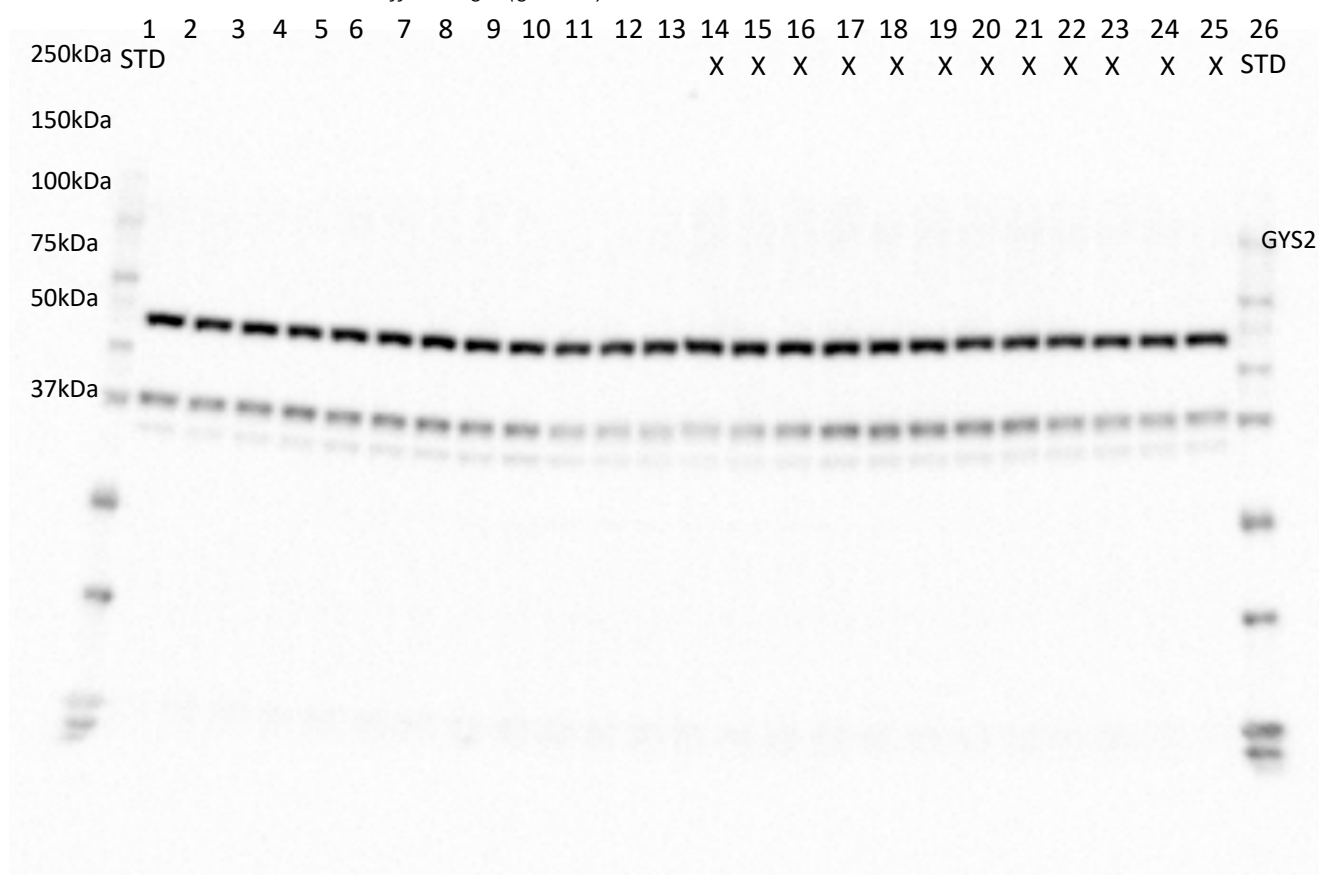

**Figure S8.** Full unedited gel for Figure FOXO1, pFOXO1(S256) and GYS2. **The sequence of application the samples into the gel wells:** 1 lane – Protein standard (STD), 2-5 lane – Control sample, 6-9 lane – HFD<sub>(+/+)</sub> sample, 10-13 lane – HFD<sub>(-ACSL1)</sub> sample, 26 lane – Protein standard (STD), the rest of the lane – other samples (not analyzed - X).

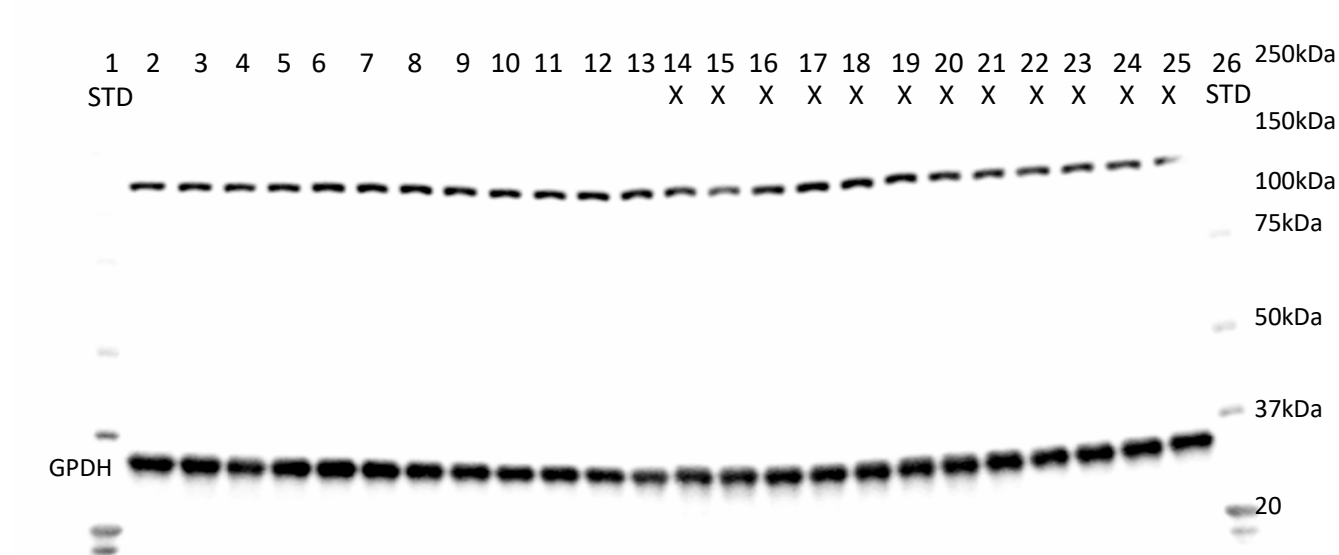

Supplement: s1 [file s1]
